# Supplementary material for: Combined Metabolome and Transcriptome Analysis Elucidates Sugar Accumulation in Wucai (Brassica campestris L.)
Source: MDPI journal article supplement (doi:10.3390/ijms24054816), 2023-03-02
Supplement: s1 [file s1]

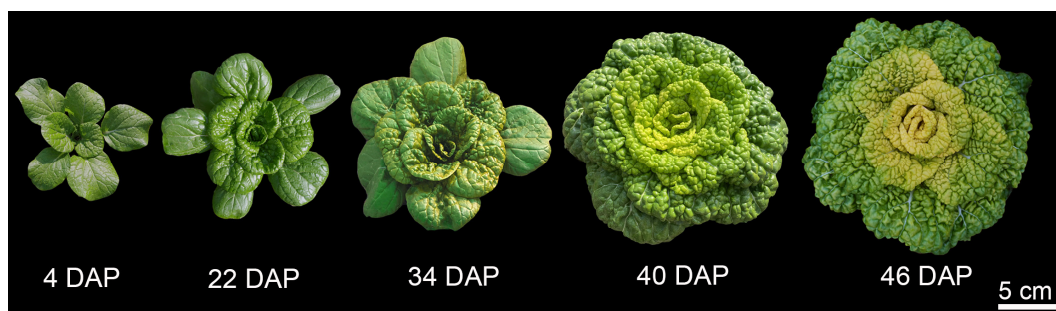

**Supplementary Figure S1.** Pictures of wucai used in this study. The wucai leaves at 34 DAP and 46 DAP were subjected to metabolome and transcriptome analysis. Samples (vein removed) were taken at 8.30 am.

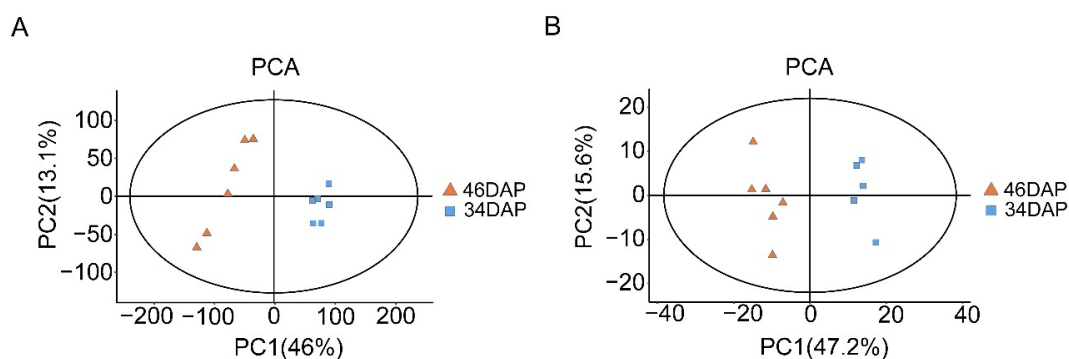

**Supplementary Figure S2.** Principal component analysis based on LC-MS/MS and GC-MS/MS in wucai leaves. (A) LC-MS/MS. (B) GC-MS/MS. The abscissa and ordinate represent the score value projected on the principal components PC1 and PC2 of each sample, respectively. The position of the sample reflects the difference between other samples. One sample collected at 34 DAP in GC-MS/MS had poor repeatability and therefore its information was deleted.

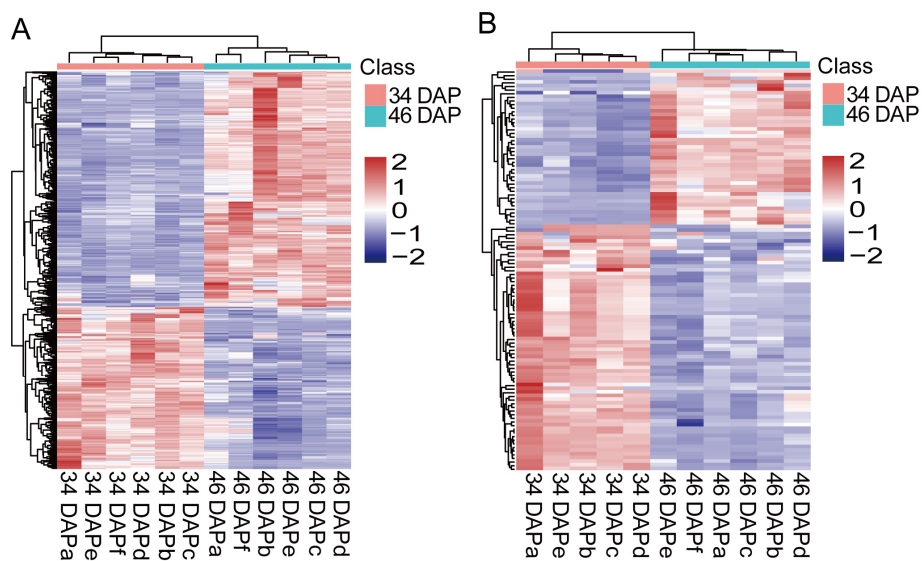

**Supplementary Figure S3.** Heat map of DAMs in LC-MS/MS and GC-MS/MS. (A) LC-MS/MS. (B) GC-MS/MS. The data obtained from expression abundance of DAMs.

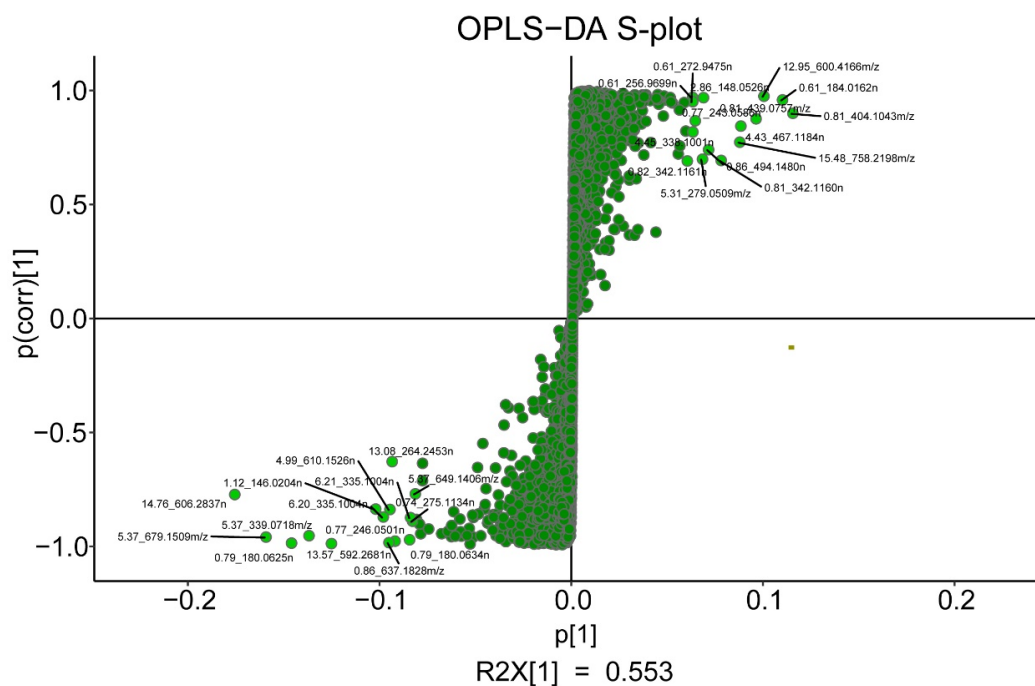

**Supplementary Figure S4.** OPLS-DA S-plot in LC-MS/MS. The x-axis is the eigenvalue of the influence of metabolites on the comparison group, and the y-axis is the correlation between sample score and metabolites. Figures marked at the top right and bottom left represent the IDs of the DAMs.

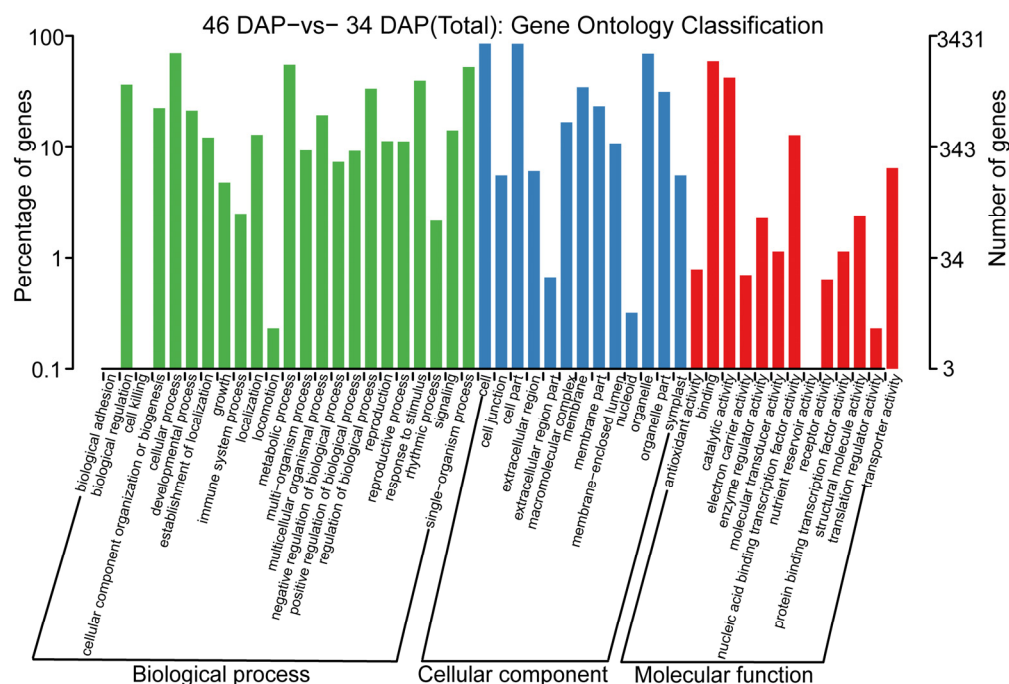

**Supplementary Figure S5.** GO distribution of DEGs in wucail leaves at 34 DAP and 46 DAP. The DEGs were based on GO categories that were grouped into three levels: biological process, cellular component, and molecular function, the left and right y-axis shows the percentage and number of genes, and the x-axis indicates specific categories of genes.

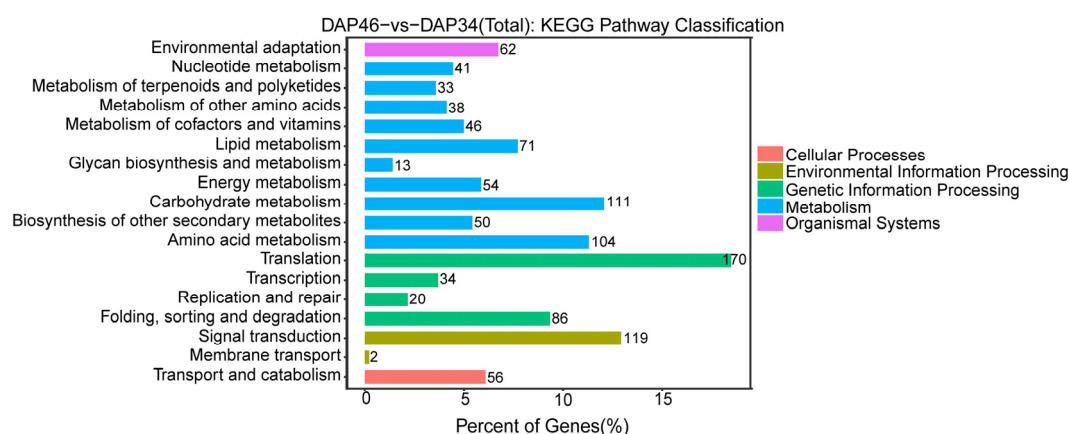

**Supplementary Figure S6.** Unigenes of wucail leaves annotated in the KEGG database. The DEGs were based on KEGG categories that were grouped into five levels: cellular processes, environmental information processing, genetic information processing, metabolism, and organismal systems. The left axis shows specific categories of the genes. The x-axis indicates percentage of genes.

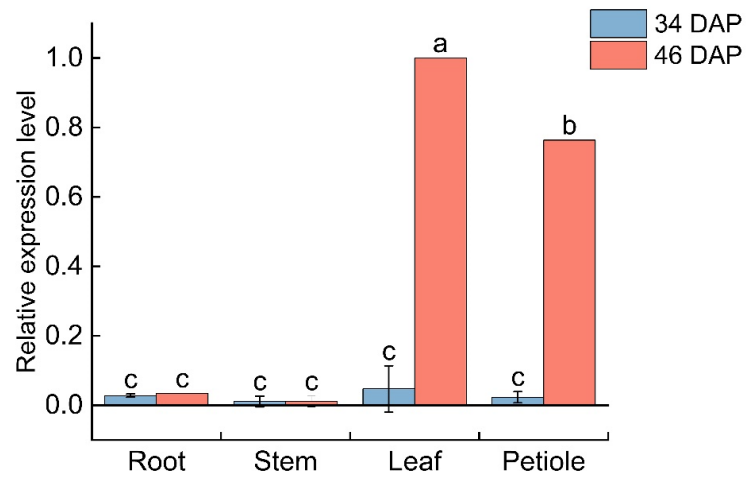

**Supplementary Figure S7.** Relative expression levels of CWINV4. Relative expression levels in wucail root, stem, leaf, and petiole at 34 DAP and 46 DAP. The relative expression in the leaves at 46 DAP was normalized to 1. Bars with different letters are significantly different at  $P < 0.05$ .

**Supplementary Table S1 Classification analysis of DAMs in LC-MS/MS**

|           | Category                                  | Number of metabolites | Proportion (%) |
|-----------|-------------------------------------------|-----------------------|----------------|
| Sup Class | Alkaloids and derivatives                 | 2                     | 0.31%          |
|           | Benzenoids                                | 19                    | 2.92%          |
|           | Hydrocarbons                              | 1                     | 0.15%          |
|           | Lignans, neolignans and related compounds | 2                     | 0.31%          |
|           | Lipids and lipid-like molecules           | 186                   | 28.62%         |
|           | Nucleosides, nucleotides, and analogues   | 17                    | 2.62%          |
|           | Organic acids and derivatives             | 69                    | 10.62%         |
|           | Organic nitrogen compounds                | 5                     | 0.77%          |
|           | Organic oxygen compounds                  | 85                    | 13.08%         |
|           | Organoheterocyclic compounds              | 47                    | 7.23%          |
|           | Organooxygen compounds                    | 1                     | 0.15%          |
|           | Organosulfur compounds                    | 6                     | 0.92%          |
|           | Phenylpropanoids and polyketides          | 84                    | 12.92%         |
|           | Others                                    | 126                   | 19.38%         |
| Class     | 2-arylbenzofuran flavonoids               | 4                     | 0.62%          |
|           | Allyl sulfur compounds                    | 1                     | 0.15%          |
|           | Aurone flavonoids                         | 1                     | 0.15%          |
|           | Azepines                                  | 1                     | 0.15%          |
|           | Azolidines                                | 1                     | 0.15%          |
|           | Benzene and substituted derivatives       | 9                     | 1.38%          |
|           | Benzodioxoles                             | 1                     | 0.15%          |
|           | Benzopyrans                               | 3                     | 0.46%          |
|           | Camptothecins                             | 1                     | 0.15%          |
|           | Carbohydrates and carbohydrate conjugates | 1                     | 0.15%          |
|           | Carboxylic acids and derivatives          | 58                    | 8.92%          |
|           | Cinnamic acids and derivatives            | 18                    | 2.77%          |
|           | Coumarins and derivatives                 | 4                     | 0.62%          |
|           | Cyclobutane lignans                       | 1                     | 0.15%          |
|           | Depsidates and depsidones                 | 3                     | 0.46%          |
|           | Diarylheptanoids                          | 2                     | 0.31%          |
|           | Diazinanes                                | 1                     | 0.15%          |
|           | Diazines                                  | 2                     | 0.31%          |
|           | Dihydrofurans                             | 1                     | 0.15%          |
|           | Dihydroisoquinolines                      | 1                     | 0.15%          |
|           | Fatty Acyls                               | 65                    | 10.00%         |
|           | Flavin nucleotides                        | 1                     | 0.15%          |
|           | Flavonoids                                | 31                    | 4.77%          |
|           | Furofurans                                | 2                     | 0.31%          |
|           | Furopyrans                                | 1                     | 0.15%          |
|           | Glycerolipids                             | 11                    | 1.69%          |
|           | Glycerophospholipids                      | 29                    | 4.46%          |
|           | Heteroaromatic compounds                  | 4                     | 0.62%          |
|           | Hydroxy acids and derivatives             | 3                     | 0.46%          |
|           | Imidazopyrimidines                        | 2                     | 0.31%          |
|           | Indoles and derivatives                   | 5                     | 0.77%          |
|           | Isocoumarans                              | 1                     | 0.15%          |
|           | Isoflavonoids                             | 6                     | 0.92%          |
|           | Kavalactones                              | 1                     | 0.15%          |
|           | Keto acids and derivatives                | 3                     | 0.46%          |
|           | Lactones                                  | 3                     | 0.46%          |
|           | Lignan glycosides                         | 1                     | 0.15%          |
|           | Linear 1,3-diarylpropanoids               | 5                     | 0.77%          |
|           | Macrolides and analogues                  | 1                     | 0.15%          |
|           | Naphthalenes                              | 1                     | 0.15%          |
|           | Nucleoside and nucleotide analogues       | 2                     | 0.31%          |

|           |                                           |     |        |
|-----------|-------------------------------------------|-----|--------|
|           | Organic disulfides                        | 1   | 0.15%  |
|           | Organic oxoanionic compounds              | 1   | 0.15%  |
|           | Organic phosphonic acids and derivatives  | 1   | 0.15%  |
|           | Organic sulfuric acids and derivatives    | 3   | 0.46%  |
|           | Organonitrogen compounds                  | 5   | 0.77%  |
|           | Organooxygen compounds                    | 84  | 12.92% |
|           | Oxanes                                    | 1   | 0.15%  |
|           | Peptidomimetics                           | 1   | 0.15%  |
|           | Phenol esters                             | 1   | 0.15%  |
|           | Phenol ethers                             | 2   | 0.31%  |
|           | Phenols                                   | 4   | 0.62%  |
|           | Phenylpropanoic acids                     | 1   | 0.15%  |
|           | Piperidines                               | 2   | 0.31%  |
|           | Polyketides                               | 24  | 3.69%  |
|           | Prenol lipids                             | 33  | 5.08%  |
|           | Pteridines and derivatives                | 1   | 0.15%  |
|           | Purine nucleosides                        | 2   | 0.31%  |
|           | Purine nucleotides                        | 9   | 1.38%  |
|           | Pyridine nucleotides                      | 1   | 0.15%  |
|           | Pyridines and derivatives                 | 2   | 0.31%  |
|           | Pyrimidine nucleosides                    | 1   | 0.15%  |
|           | Pyrrolizidines                            | 1   | 0.15%  |
|           | Pyrrolizines                              | 1   | 0.15%  |
|           | Quinolines and derivatives                | 5   | 0.77%  |
|           | Ribonucleoside 3'-phosphates              | 1   | 0.15%  |
|           | Saxitoxins, gonyautoxins, and derivatives | 1   | 0.15%  |
|           | Sphingolipids                             | 7   | 1.08%  |
|           | Steroids and steroid derivatives          | 11  | 1.69%  |
|           | Sterol Lipids                             | 6   | 0.92%  |
|           | Stilbenes                                 | 4   | 0.62%  |
|           | Sulfoxides                                | 2   | 0.31%  |
|           | Tannins                                   | 2   | 0.31%  |
|           | Tetralins                                 | 1   | 0.15%  |
|           | Tetrapyrroles and derivatives             | 5   | 0.77%  |
|           | Thioethers                                | 1   | 0.15%  |
|           | Thiols                                    | 1   | 0.15%  |
|           | Tropane alkaloids                         | 1   | 0.15%  |
|           | Unsaturated hydrocarbons                  | 1   | 0.15%  |
|           | Others                                    | 127 | 19.54% |
| Sub Class | 1-benzopyrans                             | 2   | 0.31%  |
|           | 1-hydroxy-2-unsubstituted benzenoids      | 1   | 0.15%  |
|           | 2-benzopyrans                             | 1   | 0.15%  |
|           | Alcohols and polyols                      | 9   | 1.38%  |
|           | Alkylthiols                               | 1   | 0.15%  |
|           | Alloxazines and isalloxazines             | 1   | 0.15%  |
|           | Amines                                    | 4   | 0.62%  |
|           | Amino acids, peptides, and analogues      | 55  | 8.46%  |
|           | Anisoles                                  | 1   | 0.15%  |
|           | Arylsulfates                              | 2   | 0.31%  |
|           | Benzenediols                              | 1   | 0.15%  |
|           | Benzoic acids and derivatives             | 4   | 0.62%  |
|           | Benzoquinolines                           | 3   | 0.46%  |
|           | Beta hydroxy acids and derivatives        | 2   | 0.31%  |
|           | Bile acids, alcohols and derivatives      | 3   | 0.46%  |

---

|                                           |    |        |
|-------------------------------------------|----|--------|
| Bisphosphonates                           | 1  | 0.15%  |
| Carbohydrates and carbohydrate conjugates | 66 | 10.15% |
| Carbonyl compounds                        | 6  | 0.92%  |
| Chalcones and dihydrochalcones            | 2  | 0.31%  |
| Chlorins                                  | 1  | 0.15%  |
| Cinnamic acid esters                      | 1  | 0.15%  |
| Cinnamic acids                            | 1  | 0.15%  |
| Cinnamylphenols                           | 2  | 0.31%  |
| Coumarin glycosides                       | 2  | 0.31%  |
| Cyclic purine nucleotides                 | 2  | 0.31%  |
| Dialkyldisulfides                         | 1  | 0.15%  |
| Dialkylthioethers                         | 1  | 0.15%  |
| Dicarboxylic acids and derivatives        | 1  | 0.15%  |
| Diterpenoids                              | 4  | 0.62%  |
| Eicosanoids                               | 3  | 0.46%  |
| Ethers                                    | 3  | 0.46%  |
| Fatty acid esters                         | 2  | 0.31%  |
| Fatty acids and conjugates                | 20 | 3.08%  |
| Fatty acyl glycosides                     | 17 | 2.62%  |
| Fatty acyl thioesters                     | 3  | 0.46%  |
| Fatty alcohols                            | 3  | 0.46%  |
| Fatty amides                              | 4  | 0.62%  |
| Flavones                                  | 3  | 0.46%  |
| Flavonoid glycosides                      | 26 | 4.00%  |
| Flavonoids                                | 22 | 3.38%  |
| Furanocoumarins                           | 1  | 0.15%  |
| Furanoisoflavonoids                       | 1  | 0.15%  |
| Furanones                                 | 1  | 0.15%  |
| Furanoquinolines                          | 2  | 0.31%  |
| Gamma butyrolactones                      | 3  | 0.46%  |
| Glycerophosphates                         | 7  | 1.08%  |
| Glycerophosphocholines                    | 3  | 0.46%  |
| Glycerophosphoglycerols                   | 5  | 0.77%  |
| Glycerophosphoinositolglycans             | 1  | 0.15%  |
| Glycerophosphoinositols                   | 7  | 1.08%  |
| Glycerophosphoserines                     | 2  | 0.31%  |
| Glycosphingolipids                        | 1  | 0.15%  |
| Glycosyl diradylglycerols                 | 1  | 0.15%  |
| Glycosylglycerols                         | 2  | 0.31%  |
| Halobenzenes                              | 1  | 0.15%  |
| Hopanoids                                 | 1  | 0.15%  |
| HyBcid peptides                           | 1  | 0.15%  |
| Hydrocarbons                              | 2  | 0.31%  |
| Hydrolyzable tannins                      | 2  | 0.31%  |
| Hydropyridines                            | 1  | 0.15%  |
| Hydroxycinnamic acids and derivatives     | 16 | 2.46%  |
| Hydroxycoumarins                          | 1  | 0.15%  |
| Hydroxyflavonoids                         | 1  | 0.15%  |
| Hydroxyindoles                            | 1  | 0.15%  |
| Hydroxyisoflavonoids                      | 1  | 0.15%  |
| Indoles                                   | 1  | 0.15%  |
| Indolines                                 | 1  | 0.15%  |
| Indolyl carboxylic acids and derivatives  | 1  | 0.15%  |
| Isoflavonoid O-glycosides                 | 4  | 0.62%  |

---

---

|                                            |    |       |
|--------------------------------------------|----|-------|
| Isoprenoids                                | 1  | 0.15% |
| Isosorbides                                | 2  | 0.31% |
| Linear diarylheptanoids                    | 2  | 0.31% |
| Lineolic acids and derivatives             | 3  | 0.46% |
| Macrolides and lactone polyketides         | 1  | 0.15% |
| Medium-chain hydroxy acids and derivatives | 1  | 0.15% |
| Medium-chain keto acids and derivatives    | 3  | 0.46% |
| Methoxybenzenes                            | 1  | 0.15% |
| Methoxyphenols                             | 2  | 0.31% |
| Monoradylglycerols                         | 3  | 0.46% |
| Monosaccharides                            | 1  | 0.15% |
| Monoterpenoids                             | 1  | 0.15% |
| N-acylpiperidines                          | 1  | 0.15% |
| Naphthalene sulfonic acids and derivatives | 1  | 0.15% |
| Nicotinamide nucleotides                   | 1  | 0.15% |
| Octadecanoids                              | 5  | 0.77% |
| O-methylated flavonoids                    | 1  | 0.15% |
| Organic pyrophosphates                     | 1  | 0.15% |
| Other Fatty Acyls                          | 2  | 0.31% |
| Other Polyketides                          | 1  | 0.15% |
| Other Sphingolipids                        | 3  | 0.46% |
| Oxazolidines                               | 1  | 0.15% |
| Oxidized glycerophospholipids              | 4  | 0.62% |
| Oxygenated hydrocarbons                    | 1  | 0.15% |
| Phosphosphingolipids                       | 2  | 0.31% |
| Piperazines                                | 1  | 0.15% |
| Polyprenols                                | 1  | 0.15% |
| Polyprenylphenols                          | 1  | 0.15% |
| Porphyrins                                 | 3  | 0.46% |
| Pregnane steroids                          | 1  | 0.15% |
| Purine deoxyribonucleotides                | 1  | 0.15% |
| Purine ribonucleotides                     | 6  | 0.92% |
| Purines and purine derivatives             | 2  | 0.31% |
| Pyridinecarboxylic acids and derivatives   | 1  | 0.15% |
| Pyrimidines and pyrimidine derivatives     | 2  | 0.31% |
| Quaternary ammonium salts                  | 1  | 0.15% |
| Quinone and hydroquinone lipids            | 1  | 0.15% |
| Secosteroids                               | 1  | 0.15% |
| Sesquiterpenoids                           | 5  | 0.77% |
| Sphingoid bases                            | 1  | 0.15% |
| Steroid conjugates                         | 1  | 0.15% |
| Steroid esters                             | 2  | 0.31% |
| Steroid lactones                           | 2  | 0.31% |
| Steroidal glycosides                       | 3  | 0.46% |
| Steroids                                   | 2  | 0.31% |
| Sterols                                    | 2  | 0.31% |
| Stilbene glycosides                        | 1  | 0.15% |
| Sulfuric acid esters                       | 1  | 0.15% |
| Terpene glycosides                         | 10 | 1.54% |
| Terpene lactones                           | 3  | 0.46% |
| Tetraterpenoids                            | 3  | 0.46% |
| Tricarboxylic acids and derivatives        | 2  | 0.31% |
| Triradylglycerols                          | 4  | 0.62% |
| Triradylglycerols                          | 1  | 0.15% |

---



---

|                                    |     |        |
|------------------------------------|-----|--------|
| Triterpenoids                      | 2   | 0.31%  |
| Tryptamines and derivatives        | 1   | 0.15%  |
| Unsaturated aliphatic hydrocarbons | 1   | 0.15%  |
| Others                             | 177 | 27.23% |

**Supplementary Table S2 Classification analysis of DAMs in GC-MS/MS**

|           | Category                                  | Number of metabolites | Proportion (%) |
|-----------|-------------------------------------------|-----------------------|----------------|
| Sup Class | Benzenoids                                | 6                     | 5.41%          |
|           | Lipids and lipid-like molecules           | 12                    | 10.81%         |
|           | Nucleosides, nucleotides, and analogues   | 2                     | 1.80%          |
|           | Organic acids and derivatives             | 30                    | 27.03%         |
|           | Organic compounds                         | 1                     | 0.90%          |
|           | Organic nitrogen compounds                | 2                     | 1.80%          |
|           | Organic oxygen compounds                  | 16                    | 14.41%         |
|           | Organoheterocyclic compounds              | 13                    | 11.71%         |
|           | Organooxygen compounds                    | 1                     | 0.90%          |
|           | Phenylpropanoids and polyketides          | 4                     | 3.60%          |
|           | Prenol lipids                             | 1                     | 0.90%          |
|           | Others                                    | 23                    | 20.72%         |
| Class     | 5'-deoxyribonucleosides                   | 1                     | 0.90%          |
|           | Azoles                                    | 1                     | 0.90%          |
|           | Benzene and substituted derivatives       | 3                     | 2.70%          |
|           | Carbohydrates and carbohydrate conjugates | 1                     | 0.90%          |
|           | Carboxylic acids and derivatives          | 27                    | 24.32%         |
|           | Cinnamic acids and derivatives            | 1                     | 0.90%          |
|           | Coumarins and derivatives                 | 1                     | 0.90%          |
|           | Diazines                                  | 2                     | 1.80%          |
|           | Fatty Acyls                               | 6                     | 5.41%          |
|           | Flavonoids                                | 1                     | 0.90%          |
|           | Furans                                    | 1                     | 0.90%          |
|           | Glycerolipids                             | 2                     | 1.80%          |
|           | Glycerophospholipids                      | 1                     | 0.90%          |
|           | Hydroxy acids and derivatives             | 1                     | 0.90%          |
|           | Imidazopyrimidines                        | 2                     | 1.80%          |
|           | Indoles and derivatives                   | 3                     | 2.70%          |
|           | Isoprenoids                               | 1                     | 0.90%          |
|           | Keto acids and derivatives                | 1                     | 0.90%          |
|           | Lactones                                  | 1                     | 0.90%          |
|           | Lipids and lipid-like molecules           | 1                     | 0.90%          |
|           | Organic phosphonic acids and derivatives  | 1                     | 0.90%          |
|           | Organonitrogen compounds                  | 2                     | 1.80%          |
|           | Organooxygen compounds                    | 16                    | 14.41%         |
|           | Phenols                                   | 3                     | 2.70%          |
|           | Prenol lipids                             | 2                     | 1.80%          |
|           | Pteridines and derivatives                | 1                     | 0.90%          |
|           | Purine nucleosides                        | 1                     | 0.90%          |
|           | Pyridines and derivatives                 | 2                     | 1.80%          |
|           | Steroids and steroid derivatives          | 1                     | 0.90%          |

|           |                                            |    |        |
|-----------|--------------------------------------------|----|--------|
| Sub Class | Stilbenes                                  | 1  | 0.90%  |
|           | Others                                     | 23 | 20.72% |
| Sub Class | 5'-deoxy-5'-thionucleosides                | 1  | 0.90%  |
|           | Alcohols and polyols                       | 3  | 2.70%  |
| Sub Class | Alpha-keto acids and derivatives           | 1  | 0.90%  |
|           | Amines                                     | 1  | 0.90%  |
| Sub Class | Amino acids, peptides, and analogues       | 26 | 23.42% |
|           | Benzaldehydes                              | 1  | 0.90%  |
| Sub Class | Benzenediols                               | 1  | 0.90%  |
|           | Benzoic acids and derivatives              | 2  | 1.80%  |
| Sub Class | Bile acids, alcohols and derivatives       | 1  | 0.90%  |
|           | Bipyridines and oligopyridines             | 1  | 0.90%  |
| Sub Class | Carbohydrates and carbohydrate conjugates  | 13 | 11.71% |
|           | Cresols                                    | 1  | 0.90%  |
| Sub Class | Fatty acids and conjugates                 | 4  | 3.60%  |
|           | Fatty acyl glycosides                      | 1  | 0.90%  |
| Sub Class | Fatty alcohols                             | 1  | 0.90%  |
|           | Flavans                                    | 1  | 0.90%  |
| Sub Class | Furoic acid and derivatives                | 1  | 0.90%  |
|           | Gamma butyrolactones                       | 1  | 0.90%  |
| Sub Class | Glycerophosphates                          | 1  | 0.90%  |
|           | Glycosyl compounds                         | 1  | 0.90%  |
| Sub Class | Guanidines                                 | 1  | 0.90%  |
|           | Hydroxycinnamic acids and derivatives      | 1  | 0.90%  |
| Sub Class | Hydroxycoumarins                           | 1  | 0.90%  |
|           | Hydroxyindoles                             | 1  | 0.90%  |
| Sub Class | Imidazoles                                 | 1  | 0.90%  |
|           | Indolyl carboxylic acids and derivatives   | 2  | 1.80%  |
| Sub Class | Medium-chain hydroxy acids and derivatives | 1  | 0.90%  |
|           | Methoxyphenols                             | 1  | 0.90%  |
| Sub Class | Monoradylglycerols                         | 2  | 1.80%  |
|           | Organic phosphonic acids                   | 1  | 0.90%  |
| Sub Class | Pterins and derivatives                    | 1  | 0.90%  |
|           | Purines and purine derivatives             | 2  | 1.80%  |
| Sub Class | Pyrimidines and pyrimidine derivatives     | 2  | 1.80%  |
|           | Pyrrolidinylpyridines                      | 1  | 0.90%  |
| Sub Class | Quinone and hydroquinone lipids            | 2  | 1.80%  |
|           | Steroids and steroid derivatives           | 1  | 0.90%  |
| Sub Class | Tricarboxylic acids and derivatives        | 1  | 0.90%  |
|           | Others                                     | 26 | 23.42% |

Supplementary Table S3. Significantly accumulated metabolite information in OPLS-DA S-plot analysis

| ID                | Metabolites                                                                            | Sub Class                                 | VIP     | P-value | log <sub>2</sub> (FC) |
|-------------------|----------------------------------------------------------------------------------------|-------------------------------------------|---------|---------|-----------------------|
| 6.20_335.1004n    |                                                                                        |                                           | 12.2884 | 0.00023 | 1.29758               |
| 5.37_679.1509m/z  | 3,4,5-trihydroxy-6-[4-hydroxy-3-(3-oxoprop-1-en-1-yl) phenoxy] oxane-2-carboxylic acid | Carbohydrates and carbohydrate conjugates | 19.9049 | 9.9E-07 | 0.98885               |
| 5.37_649.1406m/z  | Dillenetin 5-glucoside-7-glucuronide                                                   | Flavonoids                                | 10.2084 | 0.00332 | 0.48853               |
| 5.37_339.0718m/z  | 6-[4-(2-carboxyethyl)-3-hydroxyphenoxy]-3,4,5-trihydroxyoxane-2-carboxylic acid        | Carbohydrates and carbohydrate conjugates | 17.1108 | 1.9E-06 | 0.62342               |
| 4.99_610.1526n    | Kaempferol 3-gentiobioside                                                             | Flavonoids                                | 11.8559 | 0.0007  | 1.30963               |
| 14.76_606.2837n   |                                                                                        |                                           | 21.932  | 0.00289 | 1.48172               |
| 13.57_592.2681n   | Pheophorbide a                                                                         | Unclassified                              | 15.6563 | 7E-10   | 3.14196               |
| 13.08_264.2453n   | 9,12,15-Octadecatrien-1-ol                                                             | Fatty alcohols                            | 11.7135 | 0.03014 | 0.25094               |
| 1.12_146.0204n    |                                                                                        |                                           | 12.7812 | 0.0006  | 0.88995               |
| 0.86_637.1828m/z  | Ibandronate                                                                            | Bisphosphonates                           | 11.9189 | 1.5E-08 | 1.30042               |
| 0.79_180.0634n    | Beta-D-Glucose                                                                         | Carbohydrates and carbohydrate conjugates | 10.5812 | 1.3E-07 | 1.21866               |
| 0.79_180.0625n    | D-Galactose                                                                            | Carbohydrates and carbohydrate conjugates | 18.2445 | 4.1E-09 | 0.94706               |
| 0.77_246.0501n    | Phosphatidyl glycerol                                                                  | Unclassified                              | 11.5252 | 5.3E-08 | 2.83877               |
| 0.81_342.1160n    | Trehalulose                                                                            | Carbohydrates and carbohydrate conjugates | 9.64825 | 0.0106  | -0.775                |
| 5.31_279.0509m/z  | Benzoyl glucuronide (Benzoic acid)                                                     | Carbohydrates and carbohydrate conjugates | 8.43694 | 0.01267 | -0.8408               |
| 0.82_342.1161n    | Kojibiose                                                                              | Fatty acyl glycosides                     | 7.45007 | 0.01104 | -1.1318               |
| 2.86_148.0526n    | Cinnamic acid                                                                          | Cinnamic acids                            | 8.49892 | 4.6E-07 | -1.2436               |
| 4.45_338.1001n    | 3,4,5-trihydroxy-6-[[[(3E)-2-oxo-4-phenylbut-3-en-1-yl]oxy}oxane-2-carboxylic acid     | Fatty acyl glycosides                     | 7.81014 | 0.00115 | -0.644                |
| 0.81_439.0757m/z  | 5'-Butyrylphosphouridine                                                               | Unclassified                              | 11.9127 | 0.00015 | -1.0662               |
| 0.81_404.1043m/z  | Quinoline-3-carboxamides                                                               | Unclassified                              | 14.2997 | 4.9E-05 | -2.6307               |
| 0.61_184.0162n    |                                                                                        |                                           | 13.6309 | 1.7E-06 | -0.9892               |
| 0.77_243.0586n    |                                                                                        |                                           | 7.96657 | 0.00029 | -0.6271               |
| 0.86_494.1480n    |                                                                                        |                                           | 8.83281 | 0.00553 | -1.6897               |
| 12.95_600.4166m/z |                                                                                        |                                           | 12.424  | 9.4E-08 | -1.0015               |
| 15.48_758.2198m/z |                                                                                        |                                           | 10.8567 | 0.00284 | -2.9219               |
| 4.43_467.1184n    |                                                                                        |                                           | 10.9264 | 0.00057 | -1.0032               |

**Supplementary Table S4. Throughput and quality of RNA-seq of the samples at 34 DAP and 46 DAP**

| ID      | RawReads<br>(M) | RawBases<br>(G) | CleanReads<br>(M) | CleanBases<br>(G) | ValidBases<br>(%) | Q30 (%) | GC (%) |
|---------|-----------------|-----------------|-------------------|-------------------|-------------------|---------|--------|
| 34 DAPa | 50.41M          | 7.56G           | 49.32M            | 6.77G             | 89.57%            | 92.82%  | 48.07% |
| 34 DAPb | 47.88M          | 7.18G           | 46.88M            | 6.46G             | 89.91%            | 92.86%  | 48.21% |
| 34 DAPc | 50.06M          | 7.51G           | 48.99M            | 6.74G             | 89.70%            | 92.77%  | 48.52% |
| 46 DAPa | 49.70M          | 7.45G           | 48.71M            | 6.73G             | 90.31%            | 93.06%  | 48.19% |
| 46 DAPb | 48.86M          | 7.33G           | 47.69M            | 6.59G             | 89.86%            | 92.63%  | 47.68% |
| 46 DAPc | 47.51M          | 7.13G           | 46.42M            | 6.41G             | 89.96%            | 92.76%  | 47.73% |

**Supplementary Table S5. Mapped results of the samples at 34 DAP and 46 DAP with the reference genomics**

| ID      | Total reads | Total mapped<br>reads | Multiple mapped | Uniquely mapped  | Mapping Ratio |
|---------|-------------|-----------------------|-----------------|------------------|---------------|
| 34 DAPa | 49316962    | 43971462(89.16%)      | 1280185(2.60%)  | 42691277(86.57%) | 89.17%        |
| 34 DAPb | 46884190    | 42031329(89.65%)      | 1224721(2.61%)  | 40806608(87.04%) | 89.65%        |
| 34 DAPc | 48986418    | 43978071(89.78%)      | 1273859(2.60%)  | 42704212(87.18%) | 89.78%        |
| 46 DAPa | 48713064    | 43514261(89.33%)      | 1254984(2.58%)  | 42259277(86.75%) | 89.33%        |
| 46 DAPb | 47686316    | 42725553(89.60%)      | 1242016(2.60%)  | 41483537(86.99%) | 89.59%        |
| 46 DAPc | 46417748    | 41551059(89.52%)      | 1217566(2.62%)  | 40333493(86.89%) | 89.51%        |

Supplementary Table S6. Primers used for qPCR analysis

| Gene name               | Primer name                | Primer sequence               |
|-------------------------|----------------------------|-------------------------------|
| <i>actin</i>            | <i>actin</i> -F            | 5'-TGGGTTTGCTGGTGACGAT-3'     |
|                         | <i>actin</i> -R            | 5'-TGCCTAGGACGACCAACAATACT-3' |
| <i>SUS</i>              | <i>SUS</i> 3-F             | 5'-CGTTGATCAGGGCAAAGGTA-3'    |
|                         | <i>SUS</i> 3-R             | 5'-CTATGGCTTCCATTGCGGAT-3'    |
| <i>BAM1</i>             | <i>BAM1</i> -F             | 5'-CGATGGGGAACACTGTGAAC-3'    |
|                         | <i>BAM1</i> -R             | 5'-ACCTCCCCAGTTATAAGCCC-3'    |
| <i>BAM3</i>             | <i>BAM3</i> -F             | 5'-TGACTCTGTGCCTGTCCTAA-3'    |
|                         | <i>BAM3</i> -R             | 5'-TTCCCACTTGAATTTCCGCA-3'    |
| <i>BAM5</i>             | <i>BAM5</i> -F             | 5'-CTCTCTTCGCTGGAAGAACC-3'    |
|                         | <i>BAM5</i> -R             | 5'-CCTCGATGTCAACAATGGCT-3'    |
| <i>BAM3-Like</i>        | <i>BAM3-like</i> -F        | 5'-TGCTGGAAGAGATCAGCAAG-3'    |
|                         | <i>BAM3-like</i> -R        | 5'-CAGGGACAGAATCACATCCC-3'    |
| <i>SS1</i>              | <i>SS1</i> -F              | 5'-CTGTATCCGTCCGATCTGC-3'     |
|                         | <i>SS1</i> -R              | 5'-CAGACTCTCCAGAGACGGAA-3'    |
| <i>BraA09g036850.3C</i> | <i>BraA09g036850.3C</i> -F | 5'-CATGCATGGCCTGAAATCCA-3'    |
|                         | <i>BraA09g036850.3C</i> -R | 5'-TCAGGTGCGTATCCATCCTC-3'    |
| <i>BraA01g000700.3C</i> | <i>BraA01g000700.3C</i> -F | 5'-CACTCCCTGGGATCTACGAC-3'    |
|                         | <i>BraA01g000700.3C</i> -R | 5'-ACGACCACATTGCTGTAACG-3'    |
| <i>SAHH2</i>            | <i>SAHH2</i> -F            | 5'-TCACCATCAAGCCACAGACT-3'    |
|                         | <i>SAHH2</i> -R            | 5'-CGGCTAACACAATGATGCCA-3'    |
| <i>CHI</i>              | <i>CHI</i> -F              | 5'-CCACCGTCTGTCATCTCACC-3'    |
|                         | <i>CHI</i> -R              | 5'-CGTTAACGGCAGCTTCATCG-3'    |
| <i>CHS1</i>             | <i>CHS1</i> -F             | 5'-CTGACACCCACCTTGACTCC-3'    |
|                         | <i>CHS1</i> -R             | 5'-CCCACCTCCCTCAAGTGTCC-3'    |
| <i>FLS1</i>             | <i>FLS1</i> -F             | 5'-CGACCGGATTTAGCTTTGGG-3'    |
|                         | <i>FLS1</i> -R             | 5'-TCGCCGATGTGAACAATGAC-3'    |
| <i>CHS3</i>             | <i>CHS3</i> -F             | 5'-GGGCCTTCTTCGTTGGATGA-3'    |
|                         | <i>CHS3</i> -R             | 5'-GTCAAGTGCATGTGGCGTTT-3'    |
| <i>CEL1</i>             | <i>CEL1</i> -F             | 5'-AGACGCTTACTCCGACCA-3'      |
|                         | <i>CEL1</i> -R             | 5'-CTGTACGCACCACGATACCTATT-3' |
| <i>BraA08g002960.3C</i> | <i>BraA08g002960.3C</i> -F | 5'-TGTTGGAGCACTGCACTTGG-3'    |
|                         | <i>BraA08g002960.3C</i> -R | 5'-ACACTTGATTATGGCGTCGG-3'    |
| <i>BGLU16</i>           | <i>BGLU16</i> -F           | 5'-AACGAGCCATTTACGGTGGT-3'    |
|                         | <i>BGLU16</i> -R           | 5'-TATGGCCGACGATGTAAGGC-3'    |
| <i>CWINV3</i>           | <i>CWINV3</i> -F           | 5'-ACAGCCTCCAGCATTCAGTC-3'    |
|                         | <i>CWINV3</i> -R           | 5'-GGCGACGTTTTGGACTTGAC-3'    |
| <i>BraA05g019040.3C</i> | <i>BraA05g019040.3C</i> -F | 5'-GTCCTCACACCTCCCAAGAA-3'    |
|                         | <i>BraA05g019040.3C</i> -R | 5'-GGGTCCAAAGATGTCGGAGA-3'    |
| <i>BraA05g027230.3C</i> | <i>BraA05g027230.3C</i> -F | 5'-ACCAGCGAGGTTCTCTTTGA-3'    |
|                         | <i>BraA05g027230.3C</i> -R | 5'-TGAAGAGAGGGACGTTTGCT-3'    |
| <i>BFRUCT3</i>          | <i>BFRUCT3</i> -F          | 5'-GTACCACCTCCAGGTATCGG-3'    |
|                         | <i>BFRUCT3</i> -R          | 5'-CCAGTGTGTTGGGACTTGGTG-3'   |
| <i>BraA03g023380.3C</i> | <i>BraA03g023380.3C</i> -F | 5'-ATCTCAGTTCCAAGCCACA-3'     |
|                         | <i>BraA03g023380.3C</i> -R | 5'-CTCCCACCTGTCCGTAAAGT-3'    |
| <i>BGLU9</i>            | <i>BGLU9</i> -F            | 5'-GCTACAAGACACGCCAAGAA-3'    |
|                         | <i>BGLU9</i> -R            | 5'-TGGTGACCTCTTGAGACCAG-3'    |
| <i>BGLU15</i>           | <i>BGLU15</i> -F           | 5'-AAGACGCTATCTCAGTCGGA-3'    |
|                         | <i>BGLU15</i> -R           | 5'-TAAACCAGCCCAAACCTGAC-3'    |
| <i>BGLU47</i>           | <i>BGLU47</i> -F           | 5'-CGTTGTTCCAAGACTTTTCGC-3'   |
|                         | <i>BGLU47</i> -R           | 5'-GTGACCGGATGATGTTGTGA-3'    |
| <i>ARB_05372</i>        | <i>ARB_05372</i> -F        | 5'-GGACAAGAACGGGAAATCGG-3'    |
|                         | <i>ARB_05372</i> -R        | 5'-TGATCCGATTGGCTACACGA-3'    |
| <i>BraA06g003260.3C</i> | <i>BraA06g003260.3C</i> -F | 5'-AATGGAGGACTGTGGTGGAG-3'    |
|                         | <i>BraA06g003260.3C</i> -R | 5'-AGCCTCCTTCAGAAGCCAAT-3'    |

---

CWINV4

CWINV4-F  
CWINV4-R

5'-AGCTTGGACATGACACGGTA-3'  
5'-TTAAACCGTCCCAGCCATCT-3'

---
